**Long Title: Determination of novel members in the *Drosophila melanogaster* anterior-posterior patterning system using natural variation**

**Short Title: Using natural variation to dissect the *Drosophila* anterior-posterior patterning system**

Ashley A. Jermusyk<sup>1</sup>, Sarah E. Gharavi<sup>1</sup>, Aslesha S. Tingare<sup>1</sup>, and Gregory T. Reeves<sup>1\*</sup>

<sup>1</sup> Department of Chemical and Biomolecular Engineering, North Carolina State University, Raleigh, NC 27606, USA

\*corresponding author

Email: [gtreeves@ncsu.edu](mailto:gtreeves@ncsu.edu)

## Abstract

The anterior-posterior axis of the developing *Drosophila melanogaster* embryo is patterned by a well-studied gene regulatory network called the Gap Gene Network. This network acts to buffer the developing pattern against noise, thereby minimizing errors in gene expression and preventing patterning defects.

In this paper, we sought to discover novel regulatory regions and transcription factors acting in a subset of the Gap network using a selection of wild-caught fly lines derived from the *Drosophila* Genetic Reference Panel (DGRP). The fly lines in the DGRP contain subtle genomic differences due to natural variation; we quantified the differences in positioning of gene expression borders of two anterior-poster patterning genes, *Krüppel* (*Kr*) and *Even-skipped* in 13 of the DGRP lines. The differences in the positions of *Krüppel* and *Even-skipped* were then correlated to specific single nucleotide polymorphisms and insertions/deletions within the select fly lines. Putative enhancers containing these genomic differences were validated for their ability to produce expression using reporter constructs and analyzed for possible transcription factor binding sites. The identified transcription factors were then perturbed and the resulting *Eve* and *Kr* positioning was determined. In this way, we found *medea*, *ultraspiracle*, *glial cells missing*, and *orthopedia* effect *Kr* and *Eve* positioning in subtle ways, while knock-down of *pangolin* produces significant shifts in *Kr* and subsequent *Eve* expression patterns. Most importantly this study points to the existence of many additional novel members that have subtle effects on this system and the degree of complexity that is present in patterning the developing embryo.

## Introduction

Spatial regulation of gene expression is of paramount importance in animal development, with improper regulation resulting in defects in development and disease states in adults [1,2]. Positional information is often initially delivered through a morphogen gradient [3,4]. Most generally, a morphogen is a molecule (usually a protein) that adopts a concentration gradient in space and that subsequently triggers expression of downstream patterning genes in a concentration-dependent fashion [3,4], typically through altering the activity of transcription factors in the affected cells' nuclei. Further signaling between these downstream genes results in a web of interconnected genetic interactions called the genetic regulatory network (GRN) [5,6]. These networks are thought to buffer the developing pattern against noise, thereby minimizing errors in gene expression and preventing patterning defects [7-9]. Due to their importance in development, hours of laborious experimental work, computational methods, and genome-wide experimental methods such as ChIP-on-chip have been invested to determine GRN topologies [10-14]. Even so, *it is thought that GRN maps remain incomplete* in even the best-characterized GRNs [8,15-18], suggesting that novel methods are required to discover unidentified components and DNA regulatory elements.

In this paper, we focus on the Gap GRN, which is responsible for patterning the anterior-posterior (AP) axis in the early *Drosophila melanogaster* embryo. This network is initiated by maternal factors, including Bicoid, Hunchback, Nanos, and Caudal [7,8,19]. *bicoid (bcd)* RNA is deposited by the mother at or near the anterior pole of the embryo and serves as a localized source of Bcd protein, which drives the establishment of an AP gradient

of Bcd [20-22]. *nanos (nos)* RNA is deposited at the posterior pole of the embryo by the mother to create a Nos protein gradient opposite the Bcd gradient [23-25]. While both *caudal (cad)* and *hunchback (hb)* RNA are deposited ubiquitously by the mother, Bcd and Nos, respectively, act to create protein gradients [25,26]. These maternal inputs subsequently activate zygotic expression of the Gap genes – including *Krüppel (Kr)*, *knirps (kni)*, *hunchback (hb)*, and *giant (gt)* -- which are expressed in broad stripes along the anterior-posterior axis [7,8,17]. Cross-repression between the gap genes serve to refine their borders [8,17,19]. The gap genes then activate the downstream pair-rule genes, which form the parasegments of the embryo [27] and control the expression of the segment polarity genes, which form the segments of the embryo [9,28].

Many of the currently-known connections within this network have been found via overt perturbations; however, we sought to find new connections within this network by quantifying subtle natural variation among wild-caught, in-bred lines that belong to the *Drosophila* Genetic Reference Panel (DGRP) [7,8,17,19,29]. Previous work has used the full DGRP panel, which consists of > 150 fly lines, to identify novel genes responsible for phenotypic changes in *Drosophila melanogaster* [29,30]. Three lines have been used to quantify variation in gene expression in AP patterning genes [31]. In this work, we focused on the subtle, but quantifiable natural variation in gene expression patterns of *Kr* and Even-skipped (*Eve*) in thirteen fly lines in the DGRP. Variations in gene expression domains were then linked to specific genomic differences between the lines. This study found how small genomic changes, even single nucleotide changes, outside of previously characterized enhancer regions can measurably impact gene expression patterns. We then used a position weight matrix approach, combined with literature ChIP-seq data, to identify possible

transcription factor binding sites within these sites of genomic variation. We measured the expression domains of *Kr* and *Eve* in fly lines in which the identified transcription factors were perturbed, and found that *Kr* and *Eve* expression is altered subtly in four cases (*medea*, *ultraspiracle*, *glial cells missing*, and *orthopedia*) and overtly in a fifth case (*pangolin*). This evidence points to a larger number of unexplored genes that act within the early embryo to control anterior-posterior patterning.

## Results

### Measureable variation exists in *Kr* and *Eve* expression among wild-caught lines

The expression patterns of *Kr* mRNA and *Eve* protein were determined in 13 of the DGRP fly lines and in a laboratory control strain (*yw*; see Materials and Methods). *Kr* is expressed in a broad stripe 43 – 53% embryo length (Fig. 1A,C). *Eve* is expressed in seven narrow stripes (at 32, 40, 47, 54, 61, 68, and 77% embryo length) (Fig. 1B,D). We measured the expression patterns for both *Kr* and *Eve* (see Materials and Methods) in the mid-sagittal plane of the embryo. Variability among the lines was found in the positioning of the two *Kr* borders and *Eve* stripes 1 – 6 (ANOVA,  $p < 0.012$ ) (Table 1, S1 Fig.). Due to the comparatively high variability within each line in positioning of *Eve* stripe 7, no statistically significant difference was found among the lines for that stripe (ANOVA,  $p = 0.08$ ).

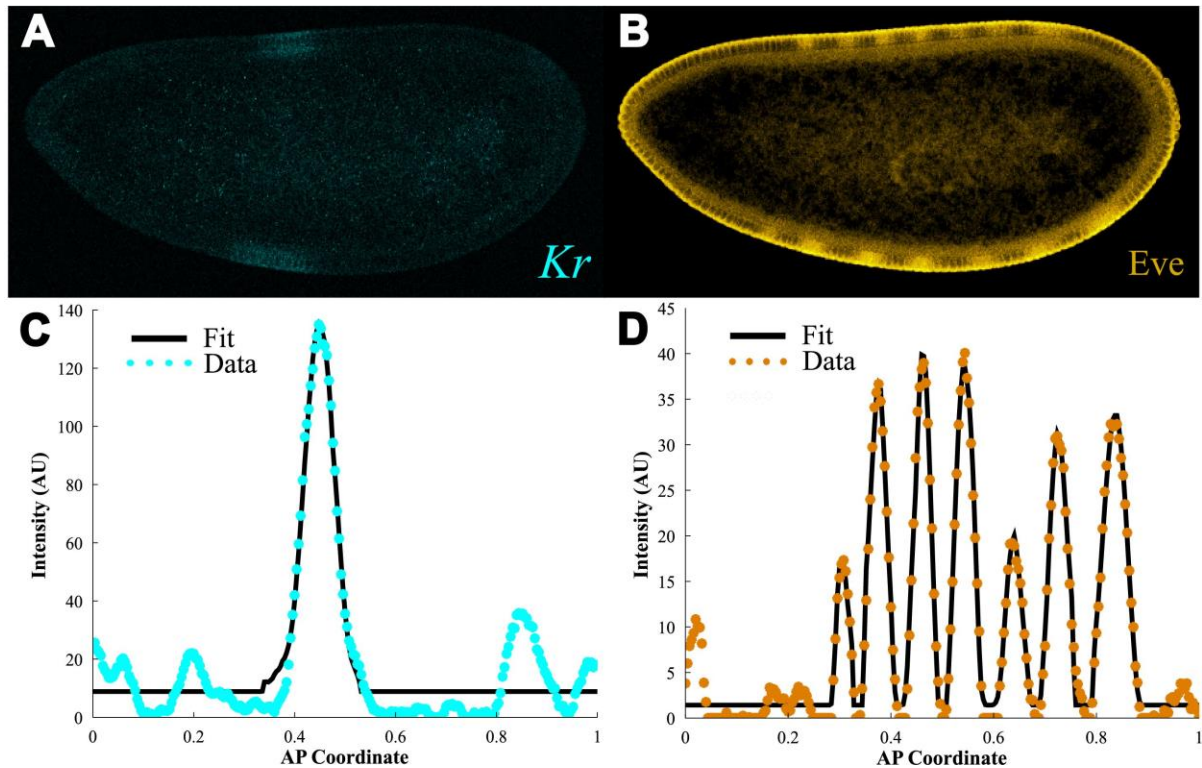

**Figure 1:** *Kr* and *Eve* expression quantified in the embryo reveals changes in gene expression among the fly lines. Normal expression of (A) *Kr* and (B) *Eve* as measured via *in situ* hybridization at the mid-sagittal section in an embryo (for these images and all images, anterior is to the left). Quantification of this expression along the dorsal half of this embryo where (\*) is the normalized expression at each point and the solid black curve is the fit for (C) *Kr* and (D) *Eve*.

**Table 1:** ANOVA analysis of positioning of *Kr* and *Eve* across fly lines

| Border or Stripe | P-value (no control) | P-value (w/control) |
|------------------|----------------------|---------------------|
| Kr (Anterior)    | 2.36E-05             | 1.50E-06            |
| Kr (Posterior)   | 4.28E-06             | 6.77E-07            |
| Eve Stripe 1     | 1.56E-06             | 6.29E-06            |
| Eve Stripe 2     | 1.98E-11             | 2.74E-11            |
| Eve Stripe 3     | 4.69E-11             | 1.09E-12            |
| Eve Stripe 4     | 1.54E-06             | 3.48E-12            |
| Eve Stripe 5     | 0.012                | 7.91E-13            |
| Eve Stripe 6     | 0.001                | 2.86E-05            |
| Eve Stripe 7     | 0.078                | 0.039               |

## Association Mapping to Locate Significant SNPs

Association mapping was used to determine if these differences in gene expression were correlated to specific genomic differences among the lines (Fig. 2A-B). All single nucleotide polymorphisms (SNPs) and short insertions and deletions (indels) 20 kb upstream and downstream of *Kr* and *eve* were evaluated; this region includes 661 SNP/indels near *Kr* and 646 near *eve*. A SNP or indel is taken as significant where there is a difference (two-sided student's t-test, p-value < 0.05; see Materials and Methods) between the position in the lines with the reference allele compared to the lines with the alternate allele (see S2 Fig.). We found 5 statistically significant variants near the *Kr* locus, and 47 near *eve*. Of those near the *eve* locus, 13 were in known enhancers or within the *eve* coding sequence; since our desire was to screen for novel regulatory elements, these were not explored [10,27,32]. To screen for false positives and validate our findings, genomic regions between 161 and 1100 bp in size surrounding the statistically significant variants were tested for their ability to drive RNA expression *in vivo* using a reporter construct. These “putative enhancer regions,” which each contained one or more significant SNP/indels, were placed upstream of an *eve* minimal promoter to drive the expression of *lacZ* (Fig. 2) [33]. Four putative enhancers for *Kr* and twelve for *eve* were tested (where the “wild-type” allele for each variant was used – see Materials and Methods). The genomic positions of these regions and the primers used to create constructs with these regions are listed in S1 Table.

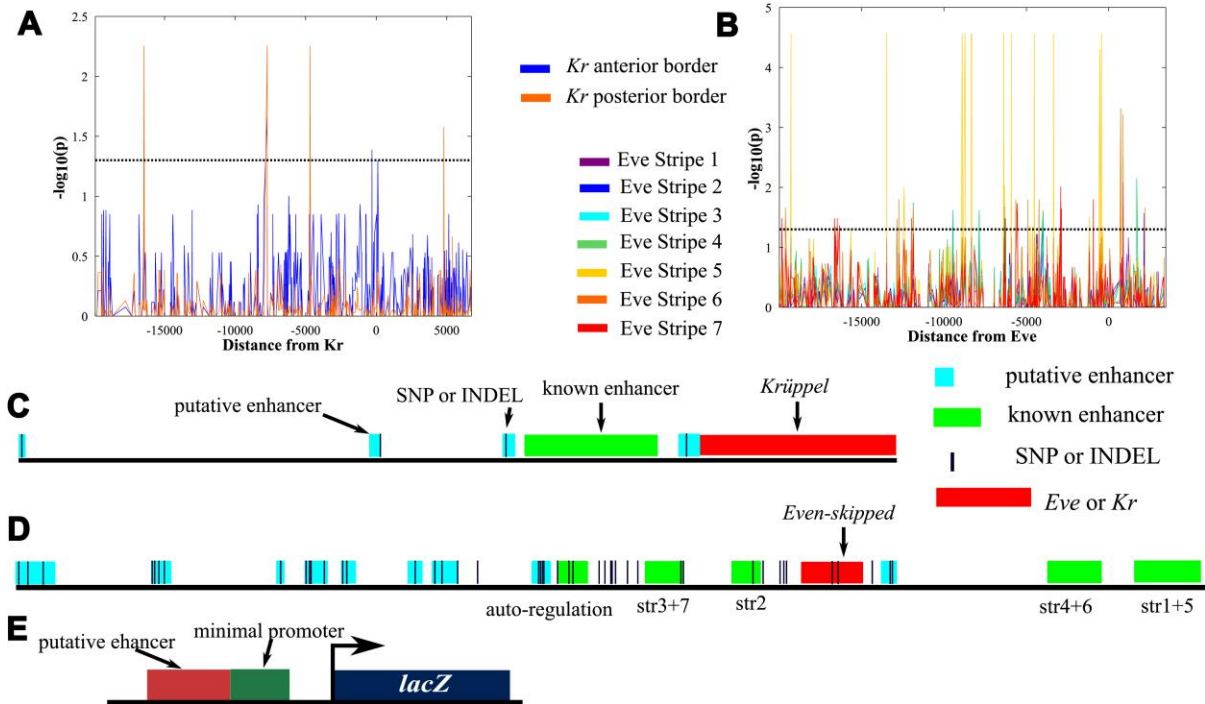

**Figure 2:** Results of association mapping analysis. Probability a given SNP or indel is correlated with changes in gene positioning for (A) *Kr* and (B) *Eve*. (C) Region surrounding the *Kr* gene with the SNPs and indels (thin dark blue bars) found to be associated with changes in *Kr* expression and the putative enhancers they were tested in. Known enhancers [34] are shown in green and putative enhancers tested are shown in cyan. (D) Locations of SNPs and indels found to be associated with changes in *eve* expression. Putative enhancer regions tested (cyan) and known enhancer regions (green, with the stripe regulated shown below, [10,27,32]) are shown. Both (C) and (D) are drawn to scale. (E) The putative enhancer plasmids contain the putative enhancer upstream of a minimal promoter. The enhancer, when active, drives expression of *lacZ*.

## Testing of Putative Enhancers

Of the 16 tested putative enhancers, three for *eve* and one for *Kr* were able to drive distinct expression *in vivo* (Fig. 3); representative embryo images are shown for all enhancers in S4 Fig. The minimal promoter used with these putative enhancers drives expression of a non-specific stripe at roughly 20-30% embryo length (Fig. 3I); only putative enhancers that generate expression outside of this region were explored further [33]. These expression patterns are relatively weak (Fig 3A, C, E, and G), which is to be expected since regulatory



elements that drive overt gene expression patterns have already been identified by other methods.

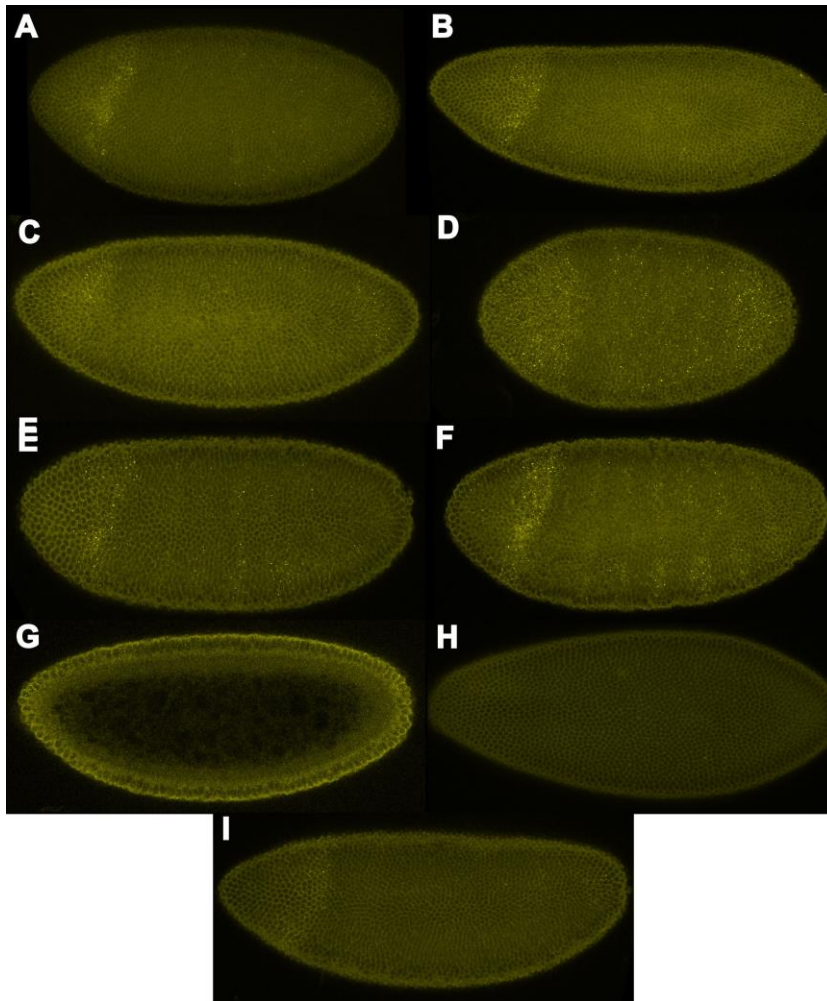

**Figure 3:** Results of Putative Enhancer Testing. (A) Expression of *lacZ* due to EveA enhancer is localized to the posterior region of the embryo. (B) In the mutated EveA enhancer expression is lost in this posterior region. (C) The EveB enhancer causes expression along the anterior and posterior poles of the embryo. (D) This anterior expression is not lost in the mutated EveB enhancer, in fact expression increases throughout the embryo. (E) The anterior pole and weak stripes of *lacZ* expression are driven by the EveC enhancer. (F) The expression in the stripes is increased in the mutated EveC enhancer, however expression in the anterior cap is lost. (G) The KrA enhancer drives expression at the anterior pole. (H) Expression is lost in the mutated KrA enhancer. (I) The putative reporter construct plasmid without any enhancer region (just the minimal promoter) drives a broad stripe of expression between 20-30% embryo length.

The putative enhancers that were able to produce expression *in vivo* in the context of the reporter constructs were mutated at the site of the SNP/indel to the alternate allele of this SNP/indel. These mutated enhancers produced altered expression patterns of the reporter gene (Fig. 3B,D,F, and H). For the EveA enhancer, the mutated version features an AACA deletion, which results in loss of the posterior expression found with the non-mutated enhancer. The change at the SNP within the EveB enhancer (from A to T) results in an increase in expression throughout the embryo. A loss in expression at the anterior pole of the embryo and simultaneously an increase in expression of stripes results from altering the EveC enhancer at the SNP (C to T). Mutating the indel (C insertion) in the KrA enhancer, results in a loss of expression in the anterior cap of the embryo.

## Determining novel transcription factors

This ability of these enhancers to drive expression and the change in these expression patterns when the SNP/indel is mutated may point to the presence of transcription factor binding sites within these putative enhancers at the SNP/indel. Therefore these enhancer regions were then analyzed using Position Weight Matrices to compile a list of transcription factor binding sites that may be present at the SNPs and indels of interest (S3 Fig., Table 2) [35-40,40-42]. Where available, ChIP data were also used to rule out or suggest transcription factors [35]. We ruled out for further investigation within this study any transcription factors already known to interact with the AP patterning system (see Table 2). The remaining transcription factors -- *glial cells missing* (*gcm*), *medea* (*med*), *orthopedia* (*otp*), *ultraspiracle* (*usp*), and *pangolin* (*pan*) -- represent possible novel components of the AP network. We then tested these transcription factors for their ability to affect *Krüppel* and Even-skipped

expression in mutant fly lines (see Materials and Methods) as compared to *yw* control expression patterns.

**Table 2:** Transcription factors identified as being likely candidates for binding to SNPs and indels of interest. Genes identified in bold were tested in this study.

| <b>Transcription Factor</b> | <b>Reporter construct</b> | <b>Suggested By</b> | <b>Notes</b>                   |
|-----------------------------|---------------------------|---------------------|--------------------------------|
| Bcd                         | EveB                      | PWM                 | AP patterning gene [8]         |
| Cad                         | EveA, EveB                | ChIP                | already known to interact [43] |
| D                           | EveA, EveB                | ChIP                | already known to interact [44] |
| Dl                          | EveA, EveC                | ChIP                | already known to interact [14] |
| En                          | EveB                      | PWM                 | AP patterning gene [45]        |
| <b>Gcm</b>                  | <b>EveA</b>               | <b>PWM</b>          | <b>tested here</b>             |
| Gt                          | EveB                      | PWM                 | AP patterning gene [8]         |
| Hkb                         | KrA                       | PWM                 | eliminated by ChIP data        |
| Kni                         | KrA                       | PWM                 | AP patterning gene [8]         |
| Kr                          | KrA                       | PWM                 | AP patterning gene [8]         |
| <b>Med</b>                  | <b>EveA, EveB</b>         | <b>ChIP</b>         | <b>tested here</b>             |
| <b>Otp</b>                  | <b>KrA</b>                | <b>PWM</b>          | <b>tested here</b>             |
| <b>Pan</b>                  | <b>EveB</b>               | <b>PWM</b>          | <b>tested here</b>             |
| Slp1                        | EveA, EveB                | ChIP                | already tested [46]            |
| Sna                         | EveA                      | PWM                 | eliminated by ChIP data        |
| Tin                         | KrA, EveA                 | PWM                 | effects eve [47]               |
| Tll                         | EveC                      | PWM                 | eliminated by ChIP data        |
| Twi                         | EveA, EveB                | ChIP                | already tested [7]             |
| <b>Usp</b>                  | <b>EveC</b>               | <b>PWM</b>          | <b>tested here</b>             |

## **gcm effects positioning of Kr and Eve stripes 6 and 7**

Enhancer EveA, which drives allele-specific expression in the posterior of the embryo, contains a possible transcription factor binding site for Glial cells missing (Gcm) at the site of the indel (per PWM analysis). The positioning of *Kr* and Eve stripes 6 and 7 (found in the posterior of the embryo) was found to be effected by knock-down of *gcm* (*glial cells missing*). We tested three different *gcm* RNAi lines, and found posterior shifts in the *Kr* domain and in the Eve 6 and 7 domains (see Fig. 4, S3 Table, S4 Table, and Materials and Methods). This shift in the positioning of Eve stripe 6 is consistent with the shift in Eve stripe 6 correlated with the indel in the EveA enhancer. However, *gcm* is known to be expressed in the anterior half of the embryo (15-35% embryo length on the ventral side) [48]. This would normally suggest an indirect effect on *Kr* and *eve* by Gcm through some other intermediary signal; however, our data suggest that Gcm directly interacts with *eve* and *Kr*. Therefore, it is possible that Gcm diffusion, combined with a Gcm binding partner expressed towards the posterior of the embryo, could be responsible for the effect on *Kr* and Eve.

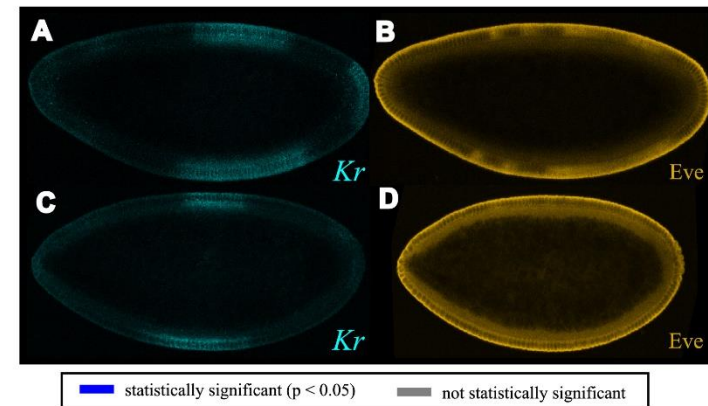

**Figure 4:** Shifts in *Kr* and *Eve* seen in mutants. In *pan* mutant BS26743 (A) *Kr* and (B) *Eve* expression. In mutant BS22312, (C) *Kr* and (D) *Eve* expression. Variation in positioning of (E) *Kr* anterior border, (F) *Kr* posterior border, (G) *Eve* stripe 1, (H) *Eve* stripe 2, (I) *Eve* stripe 3, (J) *Eve* stripe 4, (K) *Eve* stripe 6, and (L) *Eve* stripe 7.

## Shifts in *Eve* stripes and *Kr* borders are observed in *usp* mutants

The maternal gene *ultraspiracle* (*usp*) was found to effect expression of *Kr* and *Eve* in the early embryo. *usp* is expressed throughout the early embryo, however only weak expression remains by mid-NC14 [49-51].

Two fly lines mutated for *usp*, one amorphic and one hypomorphic, were found to produce shifts in the borders of *Kr* and *Eve* stripes 1, 2

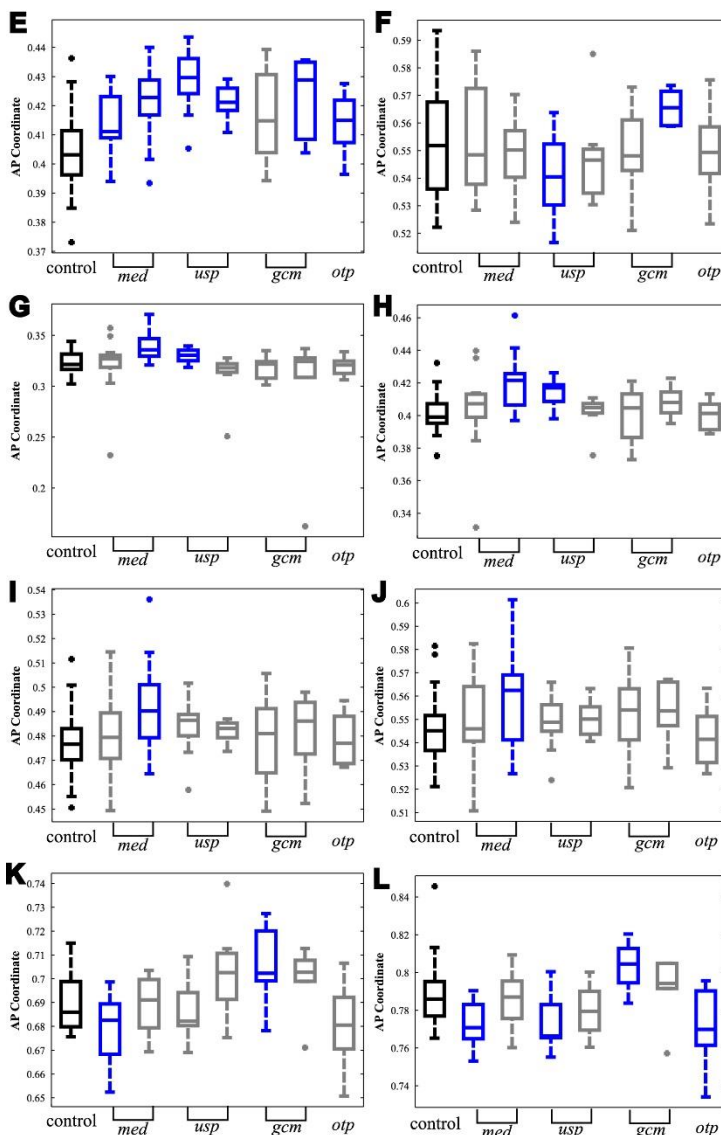

and 7 (Fig. 4, S3 Table, S4 Table, and Materials and Methods). *usp* was tested because PWM analysis points to a binding site at the SNP in the EveC enhancer. This SNP was correlated with a shift in Eve stripe 5. Using the reporter constructs, this EveC enhancer produces *lacZ* expression in the anterior pole, which is lost when the SNP is mutated, and in stripes throughout the embryo where expression increases by mutating the SNP (Fig. 3). This expression due to the EveC enhancer (and the changes in expression when the SNP within the enhancer is mutated) are consistent with regions of the embryo where *Kr* and Eve stripe 1, 2, and 7 are located. While this effect of *usp* does not directly address why Eve stripe 5 was correlated with the SNP in its genomic context, perhaps further regulatory mechanisms effect the read-out of the SNP besides *usp*.

## ***medea* results in subtle shifts in *Kr* and Eve throughout the AP axis**

ChIP data (supported by PWM analysis) suggest a binding site for Medea (*Med*) in either EveA or EveB enhancer, at the SNP/indel contained within these reporter constructs. The SNP/indel within the EveA and EveB putative enhancers were correlated with a shift in Eve stripe 6 and stripe 5 respectively. Testing of *medea* mutants showed shifts in both the *Kr* anterior border and positioning of all Eve stripes (Fig. 4, S3 Table, S4 Table, and Materials and Methods). These effects spread throughout the entire embryo are consistent with expression observed due to the mutant EveA putative enhancer. Since *med* is maternally deposited and found ubiquitously throughout the early embryo these effects are consistent with the region where Medea is known to be present [52]. The main role of Medea is as an

effector molecule for the Bone Morphogenetic Protein (BMP) pathway, which patterns the dorsal axis of the embryo [52]. However, Medea, and other elements of the Dpp pathway, also affect Wiggless signaling [53], which has an AP patterning role at this stage [54]. In particular, Mad, which partners with Medea in BMP signal transduction [52], interacts with the Wiggless effector protein Pangolin [53], which was also identified in our screen (see below).

### **Positioning of *Kr* and Eve stripe 7 are shifted in *otp* mutants**

PWM analysis suggested an Orthopedia (*otp*) binding site is present at the SNP in the *KrA* enhancer. This enhancer drives expression at the anterior pole, which is lost when the SNP is mutated (Fig 4). The SNP in the *KrA* enhancer was found to be correlated with a shift in the anterior border of *Kr*. An *otp* RNAi knockdown fly line has a shift in the expression of the anterior border of *Kr* and in Eve stripe 7 (Fig. 4, S3 Table, S4 Table, and Materials and Methods). *otp* is a Hox gene which is known to be active following gastrulation [49-51,55]. However, RNAseq data have found transcripts in this time period (2-4 hour old embryos) [56]. This suggests some low level of *otp* expression that affects *Kr* and possibly also Eve expression.

### ***pangolin* mutations result in large shifts in *Kr* and Eve expression**

The most significant effects were observed for fly lines mutated for *pangolin* (*pan*). *pan* expression is expressed ubiquitously throughout the early embryo and was tested based on PWM analysis of the EveB enhancer. The EveB enhancer generates expression at the

anterior pole; however the mutated reporter construct generates expression throughout the embryo. Two different mutant fly lines, one expressing an RNAi knockdown (BS26743) and one with an insertion in the gene (BS22312) were tested. The *Kr* and *Eve* patterns produced by these fly lines were variable within these mutant populations. Significant differences compared to wild-type patterns were observed, examples for each fly line are seen in Fig. 4. For the insertion fly line (Fig. 4C,D), approximately half (7 out of 13) of the embryos tested exhibited this pattern. Over a quarter of the flies (4 out of 14) tested in the RNAi knockdown line (Fig 4A,B) showed this large expansion of the *Kr* domain and subsequent disruption in the *Eve* pattern. This suggests *pan* is necessary for the proper positioning of *Kr* and *Eve*.

## Discussion

Typical methods to study GRNs include labor-intensive single-gene analysis [10,11,57] and genome-wide studies (e.g., [12,13,58,59]). In each of these cases, either the laboratory strain, or overtly-perturbed mutants are studied. Given that even the best-studied enhancers need further dissection before we attain a full understanding of *cis*-regulation [16], we used an alternative approach that focused on using the wild-caught DGRP lines to uncover the causes of subtle variation. In both engineering and systems biology contexts, subtle differences may point to compensatory regulation [60-64]. Therefore, we were not concerned with characterizing subtle differences *per sé*, but instead, we leveraged them to discover novel actors and regulation. Such regulation is difficult to discern in the laboratory strain, as it operates invisibly until a disturbance variable (e.g., small variations in humidity or nutrition) upsets the system [64]. As such, it may be a mechanistic example of the notions of cryptic variation and buffering [65-69].



Previous work has taken advantage of natural variation among the DGRP fly lines to discover new genes involved in the phenotypic and quantitative differences between these lines [29-31]. In doing so, new genes responsible for effects within diverse systems have been determined. Here we demonstrated the ability to detect subtle variations in *Kr* and *Eve* expression patterns, which led us to identify candidate genomic variants for further testing. Using reporter constructs, we were able to validate these putative regulatory regions containing these genomic variants and identified certain SNP/indels which are able to produce allele-specific activity and therefore likely are at transcription factor binding sites. Through this analysis we identified novel transcription factors (*usp*, *med*, *gcm*, and *otp*) that, when mutated, produce subtle variations in the position of *Kr* and *Eve* stripes. These subtle variations are consistent with the variations seen when the SNP/indels suspected of being their binding sites are mutated.

In this manner we also identified *pangolin*, which is able to produce large variations in *Kr* and *Eve*. The results of these analyses points to a greater network of genes involved in the anterior-posterior patterning system. In addition, this study demonstrates the ability of a SNP/indel to produce subtle, yet identifiable variations in gene expression. The methodology used in this study can be applied to further studies using the DGRP fly lines. A larger sample of lines (or all DGRP lines) can be tested, which would allow for SNPs to be explored throughout the genome (at significant distance from the gene of interest). This can identify trans-acting factors which were previously difficult to identify.

## Materials and Methods

### Embryo Staining and Image Collection

Embryos 2-4 hrs after egg lay, were fixed using formaldehyde per standard protocols.

Subsequently, fluorescent *in situ* hybridization was used to image RNA and protein expression per published protocols (per [70] with proteinase K treatment omitted). RNA probes for *lacZ* (biotin conjugated) and *Kr* (fluorescein conjugated) were used. Primary antibodies to biotin (goat, anti-biotin, 1:5000, gift from Immunoreagents), Eve (mouse anti-Eve, 1:10; Developmental Studies Hybridoma Bank), and fluorescein (rabbit, anti-fluorescein, 1:500; ThermoFisher Scientific). Secondary antibodies used were Alexa Fluor 488 donkey anti-rabbit (ThermoFisher Scientific), Alexa Fluor 546 donkey anti-goat (ThermoFisher Scientific), and AlexaFluor 546 donkey anti-mouse (ThermoFisher Scientific). Images were taken using a Zeiss Confocal microscope. Quantification of *Kr* and Eve was performed on images taken at the mid-sagittal plane and analyzed using Matlab, see [71].

### Plasmid Construction

The putative enhancer plasmids were cloned into the Evec:lacZ vector (gift from [33]) using EcoRI, BglII, or AscI. Enhancer regions were amplified from yw genomic DNA using primers listed in S1 Table. Mutations were introduced into the reporter constructs using mutagenesis PCR (primers listed in S2 Table). All PCR was carried out using Q5 Polymerase (New England BioLabs).

## Fly lines

*yw* was used as a laboratory control strain. Natural variation fly lines were provided by Trudy MacKay [29]. The lines denoted in this paper as 1-13, are RAL41, RAL57, RAL105, RAL306, RAL307, RAL315, RAL317, RAL360, RAL705, RAL761, RAL765, RAL799, and RAL801(in that order). Mutants for suspect transcription factors were obtained from Blooming Stock Center: *Medea* (BS9033 [Med<sup>1</sup>] and BS9006 [Med<sup>5</sup>] from ethyl methanesulfonate mutagenesis), *pangolin* (RNAi knockdown line BS26743 and knockdown by transposable insertion within gene BS22312), *ultraspiracle* (hypomorphic line BS4660 and amorphic line BS31414), *glial cells missing* (RNAi knockdown lines BS28913, BS31518, and BS31519), and *orthopedia* (RNAi knockdown line BS57582). The reporter construct and mutant reporter construct fly lines were created by injection and incorporation of plasmid constructs into the 68A4 landing site (*yw*; attP2 flies) for the KrA:lacZ, EveL:lacZ, EveI:lacZ, and EveK:lacZ injections were performed by Model System injections. KrB:lacZ, KrC:lacZ, KrD:lacZ,, EveA:lacZ, EveB:lacZ, EveC:lacZ, EveD:lacZ:, EveE:lacZ, EveF:lacZ, EveG:lacZ, EveH:lacZ, EveJ:lacZ injections were performed by Genetic Services, Inc. KrBmut:lacZ, EveBmut:lacZ, EveCmut:lacZ, Evep:lacZ and EveGmut:lacZ injections were performed by GenetiVision Inc.

## Identification of Novel Transcription Factors

Identification of novel transcription factors using position weight matrices was carried out for the region surrounding the SNP within the enhancers that generated expression *in vivo*. The position weight matrices used were obtained from [35-40,40-42]. Probability of a

transcription factor binding site being present within a given series was calculated by multiplying the probability of the given nucleotide at each position in the sequence and dividing this by the probability in a random sequence (calculated from a 10,000 bp *Drosophila melanogaster* exon region). Transcription factors where the presence of a site at the SNP/indel has  $p < 0.0005$  were explored. Chromatin immunoprecipitation data were taken from MacArthur et al, 2009 [35].

## Acknowledgements

We would like to thank Dr. MacKay for the fly lines used in this study and helpful discussions.

## References

1. Freeman M. Feedback control of intercellular signaling in development. *Nature*. 2000;408: 313-319.
2. Potter JD. Morphogens, morphostats, microarchitecture and malignancy. *Nat Rev Cancer*. 2007;7: 464-474. doi: 10.1038/nrc2146.
3. Wolpert L. Positional Information and Spatial Pattern of Cellular Differentiation. *J Theor Biol*. 1969;25: 1-&.
4. Wolpert L. Positional information and pattern formation. *Philos Trans R Soc Lond , B, Biol Sci*. 1981;295: 441-450.
5. Davidson EH, Rast JP, Oliveri P, Ransick A, Caestani C, Yuh C, et al. A genomic regulatory network for development. *Science*. 2002;295: 1669-1678. doi: 10.1126/science.1069883.
6. Levine M, Davidson EH. Gene regulatory networks for development. *Proc Natl Acad Sci USA*. 2005;102: 4936-4942. doi: 10.1073/pnas.0408031102.
7. Bieler J, Pozzorini C, Naef F. Whole-embryo modeling of early segmentation in *Drosophila* identifies robust and fragile expression domains. *Biophys J*. 2011;101: 287-296. doi: 10.1016/j.bpj.2011.05.060.

8. Perkins TJ, Jaeger J, Reinitz J, Glass L. Reverse engineering the gap gene network of *Drosophila melanogaster*. *PLoS Comput Biol*. 2006;2: 417-428. doi: 10.1371/journal.pcbi.0020051.
9. von Dassow G, Meir E, Munro EM, Odell GM. The segment polarity network is a robust developmental module. *Nature*. 2000;406: 188-188-192.
10. Small S, Blair A, Levine M. Regulation of even-skipped stripe 2 in the *Drosophila* embryo. *EMBO J*. 1992;11: 4047-4057.
11. Yuh CH, Bolouri H, Davidson EH. Genomic cis-regulatory logic: experimental and computational analysis of a sea urchin gene. *Science*. 1998;279: 1896-1902. doi: 10.1126/science.279.5358.1896.
12. Markstein M, Markstein P, Markstein V, Levine MS. Genome-wide analysis of clustered Dorsal binding sites identifies putative target genes in the *Drosophila* embryo. *Proc Natl Acad Sci U S A*. 2002;99: 763-768. doi: 10.1073/pnas.012591199.
13. Sandmann T, Girardot C, Brehme M, Tongprasit W, Stolc V, Furlong EEM. A core transcriptional network for early mesoderm development in *Drosophila melanogaster*. *Genes Dev*. 2007;21: 436-449. doi: 10.1101/gad.1509007.
14. Zeitlinger J, Zinzen RP, Stark A, Kellis M, Zhang H, Young RA, et al. Whole-genome ChIP-chip analysis of Dorsal, Twist, and Snail suggests integration of diverse patterning processes in the *Drosophila* embryo. *Genes Dev*. 2007;21: 385-390. doi: 10.1101/gad.1509607.
15. Jaeger J, Surkova S, Blagov M, Janssens H, Kosman D, Kozlov K, et al. Dynamic control of positional information in the early *Drosophila* embryo. *Nature*. 2004;430: 368-371. doi: 10.1038/nature02678.
16. Johnson LA, Zhao Y, Golden K, Barolo S. Reverse-engineering a transcriptional enhancer: a case study in *Drosophila*. *Tissue Eng Part A*. 2008;14: 1549-1549-1559.
17. Jaeger J. The gap gene network. *Cell Mol Life Sci*. 2011;68: 243-274. doi: 10.1007/s00018-010-0536-y.
18. Kicheva A, Cohen M, Briscoe J. Developmental pattern formation: insights from physics and biology. *Science*. 2012;338: 210-212. doi: 10.1126/science.1225182.
19. Sokolowski TR, Erdmann T, ten Wolde Pieter Rein. Mutual repression enhances the steepness and precision of gene expression boundaries. *PLoS Comput Biol*. 2012;8: e1002654. doi: 10.1371/journal.pcbi.1002654.
20. Lucas T, Ferraro T, Roelens B, De Las Heras Chanes Jose, Walczak AM, Coppey MaD, Nathalie. Live imaging of bicoid-dependent transcription in *Drosophila* embryos. *Curr Biol*. 2013;23: 2135-2139. doi: 10.1016/j.cub.2013.08.053.
21. Morrison AH, Scheeler M, Dubuis J, Gregor T. Quantifying the Bicoid morphogen gradient in living fly embryos. *Cold Spring Harb Protoc*. 2012;2012: 398-406. doi: 10.1101/pdb.top068536.
22. Tamari Z, Barkai N. Improved readout precision of the Bicoid morphogen gradient by early decoding. *J Biol Phys*. 2012;38: 317-329. doi: 10.1007/s10867-011-9250-8.
23. Gavis ER, Lehmann R. Localization of Nanos Rna Controls Embryonic Polarity. *Cell*. 1992;71: 301-313.
24. Wang C, Dickinson LK, Lehmann R. Genetics of nanos localization in *Drosophila*. *Dev Dyn*. 1994;199: 103-103-115.

25. Wharton RP, Struhl G. RNA regulatory elements mediate control of *Drosophila* body pattern by the posterior morphogen nanos. *Cell*. 1991;67: 955-967. doi: 10.1016/0092-8674(91)90368-9.
26. Macdonald PM, Struhl G. A molecular gradient in early *Drosophila* embryos and its role in specifying the body pattern. *Nature*. 1986;324: 537-545. doi: 10.1038/324537a0.
27. Small S, Blair A, Levine M. Regulation of two pair-rule stripes by a single enhancer in the *Drosophila* embryo. *Dev Biol*. 1996;175: 314-324. doi: 10.1006/dbio.1996.0117.
28. McGinnis W, Krumlauf R. Homeobox genes and axial patterning. *Cell*. 1992;68: 283.
29. Mackay TFC, Richards S, Stone EA, Barbadilla A, Ayroles JF, Zhu D, et al. The *Drosophila melanogaster* Genetic Reference Panel. *Nature*. 2012;482: 173-178. doi: 10.1038/nature10811.
30. Huang W, Massouras A, Inoue Y, Peiffer J, Ramia M, Tarone AM, et al. Natural variation in genome architecture among 205 *Drosophila melanogaster* Genetic Reference Panel lines. *Genome Res*. 2014;24: 1193-1208. doi: 10.1101/gr.171546.113.
31. Jiang P, Ludwig MZ, Kreitman M, Reinitz J. Natural variation of the expression pattern of the segmentation gene even-skipped in *melanogaster*. *Dev Biol*. 2015;405: 173-181. doi: 10.1016/j.ydbio.2015.06.019.
32. Fujioka M, Emi-Sarker Y, Yusibova GL, Goto T, Jaynes JB. Analysis of an even-skipped rescue transgene reveals both composite and discrete neuronal and early blastoderm enhancers, and multi-stripe positioning by gap gene repressor gradients. *Development*. 1999;126: 2527-2538.
33. Liberman LM, Stathopoulos A. Design flexibility in cis-regulatory control of gene expression: synthetic and comparative evidence. *Dev Biol*. 2009;327: 578-589. doi: 10.1016/j.ydbio.2008.12.020.
34. Hoch M, Seifert E, Jackle H. Gene-Expression Mediated by Cis-Acting Sequences of the Kruppel Gene in Response to the *Drosophila* Morphogens Bicoid and Hunchback. *EMBO J*. 1991;10: 2267-2278.
35. MacArthur S, Li X, Li J, Brown JB, Chu HC, Zeng L, et al. Developmental roles of 21 *Drosophila* transcription factors are determined by quantitative differences in binding to an overlapping set of thousands of genomic regions. *Genome Biol*. 2009;10: R80. doi: 10.1186/gb-2009-10-7-r80.
36. Down TA, Bergman CM, Su J, Hubbard TJP. Large-scale discovery of promoter motifs in *Drosophila melanogaster*. *PLoS Comput Biol*. 2007;3: 95-109. doi: 10.1371/journal.pcbi.0030007.
37. Kulakovskiy IV, Makeev VJ. Discovery of DNA motifs recognized by transcription factors through integration of different experimental sources. *Molecular Biophysics*. 2009;54: 667-667-674.
38. Noyes MB, Christensen RG, Wakabayashi A, Stormo GD, Brodsky MH, Wolfe SA. Analysis of homeodomain specificities allows the family-wide prediction of preferred recognition sites. *Cell*. 2008;133: 1277-1289. doi: 10.1016/j.cell.2008.05.023.
39. Noyes MB, Meng X, Wakabayashi A, Sinha S, Brodsky MH, Wolfe SA. A systematic characterization of factors that regulate *Drosophila* segmentation via a bacterial one-hybrid system. *Nucleic Acids Res*. 2008;36: 2547-2560. doi: 10.1093/nar/gkn048.

40. Papatsenko D, Levine M. A rationale for the enhanceosome and other evolutionarily constrained enhancers. *Curr Biol.* 2007;17: R955-R957. doi: 10.1016/j.cub.2007.09.035.
41. Bergman C, Carlson J, Celniker S. Drosophila DNase I footprint database: a systematic genome annotation of transcription factor binding sites in the fruitfly, *Drosophila melanogaster*. *Bioinformatics.* 2005;21: 1747-1749. doi: 10.1093/bioinformatics/bti173.
42. Pollard DA, Moses AM, Iyer VN, Eisen MB. Detecting the limits of regulatory element conservation and divergence estimation using pairwise and multiple alignments. *BMC Bioinformatics.* 2006;7: 376. doi: 10.1186/1471-2105-7-376.
43. Moreno E, Morata G. Caudal is the Hox gene that specifies the most posterior *Drosophila* segment. *Nature.* 1999;400: 873-873-877.
44. Russell S, Sanchez-Soriano N, Wright C, Ashburner M. The Dichaete gene of *Drosophila melanogaster* encodes a SOX-domain protein required for embryonic segmentation. *Development.* 1996;122: 3669-3669-3676.
45. Fujioka M, Jaynes JB, Goto T. Early even-skipped stripes act as morphogenetic gradients at the single cell level to establish *engrailed* expression. *Development.* 1995;121: 4371-4371-4382.
46. Grossniklaus U, Cadigan KM, Gehring WJ. Three maternal coordinate systems cooperate in the patterning of the *Drosophila* head. *Development.* 1994;120: 3155-3155-3171.
47. Knirr S, Frasch M. Molecular integration of inductive and mesoderm-intrinsic inputs governs *even-skipped* enhancer activity in a subset of pericardial and dorsal muscle progenitors  
Author links open overlay pan  
*Developmental biology.* 2001;238: 13-13-26.
48. Jones BW, Fetter RD, Tear G, Goodman CS. *glial cells missing*: a genetic switch that controls glial versus neuronal fate. *Cell.* 1995;82: 1013-1013-1023.
49. Hammonds AS, Bristow CA, Fisher WW, Weiszmann R, Wu S, Hartenstein V, et al. Spatial expression of transcription factors in *Drosophila* embryonic organ development. *Genome Biol.* 2013;14: R140. doi: 10.1186/gb-2013-14-12-r140.
50. Tomancak P, Berman BP, Beaton A, Weiszmann R, Kwan E, Hartenstein V, et al. Global analysis of patterns of gene expression during *Drosophila* embryogenesis. *Genome Biol.* 2007;8: R145. doi: 10.1186/gb-2007-8-7-r145.
51. Tomancak P, Berman BP, Beaton A, Weiszmann R, Kwan E, Shu S, et al. Systematic determination of patterns of gene expression during *Drosophila* embryogenesis. *Genome Biol.* 2002;3: 1-1-88.
52. Raftery L, Sutherland D. Gradients and thresholds: BMP response gradients unveiled in *Drosophila* embryos. *Trends Genet.* 2003;19: 701-708. doi: 10.1016/j.tig.2003.10.009.
53. Eivers E, Demagny H, Choi RH, Robertis EMD. Phosphorylation of Mad controls competition between wingless and BMP signaling. *Sci Signal.* 2011;4: ra68. doi: 10.1126/scisignal.2002034.
54. Swarup S, Verheyen EM. Wnt/Wingless signaling in *Drosophila*. *Cold Spring Harb Perspect Biol.* 2012;4: a007930. doi: 10.1101/cshperspect.a007930.

55. Simeone A, D'Aice M, Nigro V, Casanova J, Graziani F, Acampora D, et al. Orthopedia, a Novel Homeobox-Containing Gene Expressed in the Developing Cns of both Mouse and Drosophila. *Neuron*. 1994;13: 83-101. doi: 10.1016/0896-6273(94)90461-8.
56. Graveley BR, Brooks AN, Carlson J, Duff MO, Landolin JM, Yang L, et al. The developmental transcriptome of *Drosophila melanogaster*. *Nature*. 2011;471: 473-479. doi: 10.1038/nature09715.
57. Yuh CH, Bolouri H, Davidson EH. Cis-regulatory logic in the *endo16* gene: switching from a specification to a differentiation mode of control. *Development*. 2001;128: 617-629.
58. Li X, MacArthur S, Bourgon R, Nix D, Pollard DA, Iyer VN, et al. Transcription factors bind thousands of active and inactive regions in the *Drosophila* blastoderm. *PLoS Biol*. 2008;6: e27. doi: 10.1371/journal.pbio.0060027.
59. Ozdemir A, Fisher-Aylor KI, Pepke S, Samanta M, Dunipace L, McCue K, et al. High resolution mapping of Twist to DNA in *Drosophila* embryos: Efficient functional analysis and evolutionary conservation. *Genome Res*. 2011. doi: 10.1101/gr.104018.109.
60. Csete ME, Doyle JC. Reverse engineering of biological complexity. *Science*. 2002;295: 1664-1669. doi: 10.1126/science.1069981.
61. Reeves GT, Fraser SE. Biological systems from an engineer's point of view. *PLoS Biol*. 2009;7: e21. doi: 10.1371/journal.pbio.1000021.
62. Lander AD. How cells know where they are. *Science*. 2013;339: 923-927. doi: 10.1126/science.1224186.
63. Reeves GT, Hrischuk CE. Survey of Engineering Models for Systems Biology. *Computational Biology Journal*. 2016;2016: 4106329-12.
64. Hrischuk CE, Reeves GT. The Cell Embodies Standard Engineering Principles. *J Bioinf Com Sys Bio*. 2017;1: 106.
65. Dworkin I, Palsson A, Birdsall K, Gibson G. Evidence that *Egfr* Contributes to Cryptic Genetic Variation for Photoreceptor Determination in Natural Populations of *Drosophila melanogaster*. *Curr Biol*. 2003;13: 1888-1888-1893.
66. Gibson G, Dworkin I. Uncovering cryptic genetic variation. *Nat Rev Genet*. 2004;5: 681-681-690.
67. Dworkin I. Canalization, cryptic variation, and developmental buffering: A critical examination and analytical perspective. In: Anonymous Variation. : Elsevier Inc.; 2005. pp. 131-131-158.
68. Gibson G, Reed LK. Cryptic genetic variation. *Curr Biol*. 2008;18: R989-R989-R990.
69. Rohner N, Jarosz DF, Kowalko JE, Yoshizawa M, Jeffery WR, Borowsky RL, et al. Cryptic Variation in Morphological Evolution: HSP90 as a Capacitor for Loss of Eyes in Cavefish. *Science*. 2013;342: 1372-1372-1375.
70. Kosman D, Mizutani CM, Lemons D, Cox WG, McGinnis W, Bier E. Multiplex detection of RNA expression in *Drosophila* embryos. *Science*. 2004;305: 846. doi: 10.1126/science.1099247.
71. Jermusyk AA, Murphy NP, Reeves GT. Analyzing negative feedback using a synthetic gene network expressed in the *Drosophila melanogaster* embryo. *BMC Systems Biology*. 2016;10: 85.



## Supporting information

**Figure S1:** Pair-wise comparison of position of *Kr* and Eve in each of the fly lines. Results of post-hoc Tukey-Kramer test, where orange denotes statistically significant ( $p < 0.05$ ) differences between the lines and blue denotes no statistically significant difference between the lines. The fly lines are in the order of: RAL150, RAL306, RAL307, RAL315, RAL317, RAL360, RAL41, RAL57, RAL705, RAL761, RAL765, RAL799, RAL801, and laboratory control; for (A) Kr Posterior, (B) Eve stripe 1, (C) Eve stripe 2, (D) Eve stripe 3, (E) Eve stripe 4, (F) Eve stripe 5, (G) Eve stripe 6, and (H) Eve stripe 7.

**Figure S2:** Example of Association Mapping. (A) Comparison of position of Eve stripe 6 in nonmutant lines ( $n_{\text{lines}} = 8$ ,  $n_{\text{embryos}} = 88$ ), compared to mutant lines ( $n_{\text{lines}} = 5$ ,  $n_{\text{embryos}} = 88$ ) for a nonsignificant SNP. (B) For a significant SNP ( $p = 0.045$ ), this SNP shows a correlation (anterior shift in Eve stripe 6) between non-mutant lines ( $n_{\text{lines}} = 8$ ,  $n_{\text{embryos}} = 123$ ) and mutant lines ( $n_{\text{lines}} = 5$ ,  $n_{\text{embryos}} = 53$ ).

**Figure S3:** Position weight matrix analysis to find probable transcription factor binding sites. Analysis for EveA reporter construct, where each line denotes one transcription factor motif (only motifs shown to be present in one reporter construct are shown). The region directly surrounding the SNP is denoted by the red box.

**Figure S4:** Expression of *lacZ* due to putative enhancer activity where no expression or expression due to only the minimal promoter is observed. (A) EveD, (B) EveE, (C) EveF, (D) EveG, (E) EveH, (F) EveI, (G) EveJ, (H) EveK, (I) EveL, (J) KrB, (K) KrC, and (L) KrD.

**Table S1:** Primers used to amplify enhancers from genomic DNA. Restriction enzyme sites in capital letters. Genomic region of enhancer is shown compared to start of respective gene.

**Table S2:** Sequence for Mutagenesis Primers. Mutation in capital letters.

**Table S3:** Shifts in positions of *Krüppel* in mutant fly lines. Shifts not statistical significant are not shown ( $p > 0.05$ ).

**Table S4:** Shifts in the positions of Eve stripes in mutant fly lines. Shifts not statistical significant are not shown ( $p > 0.05$ ).

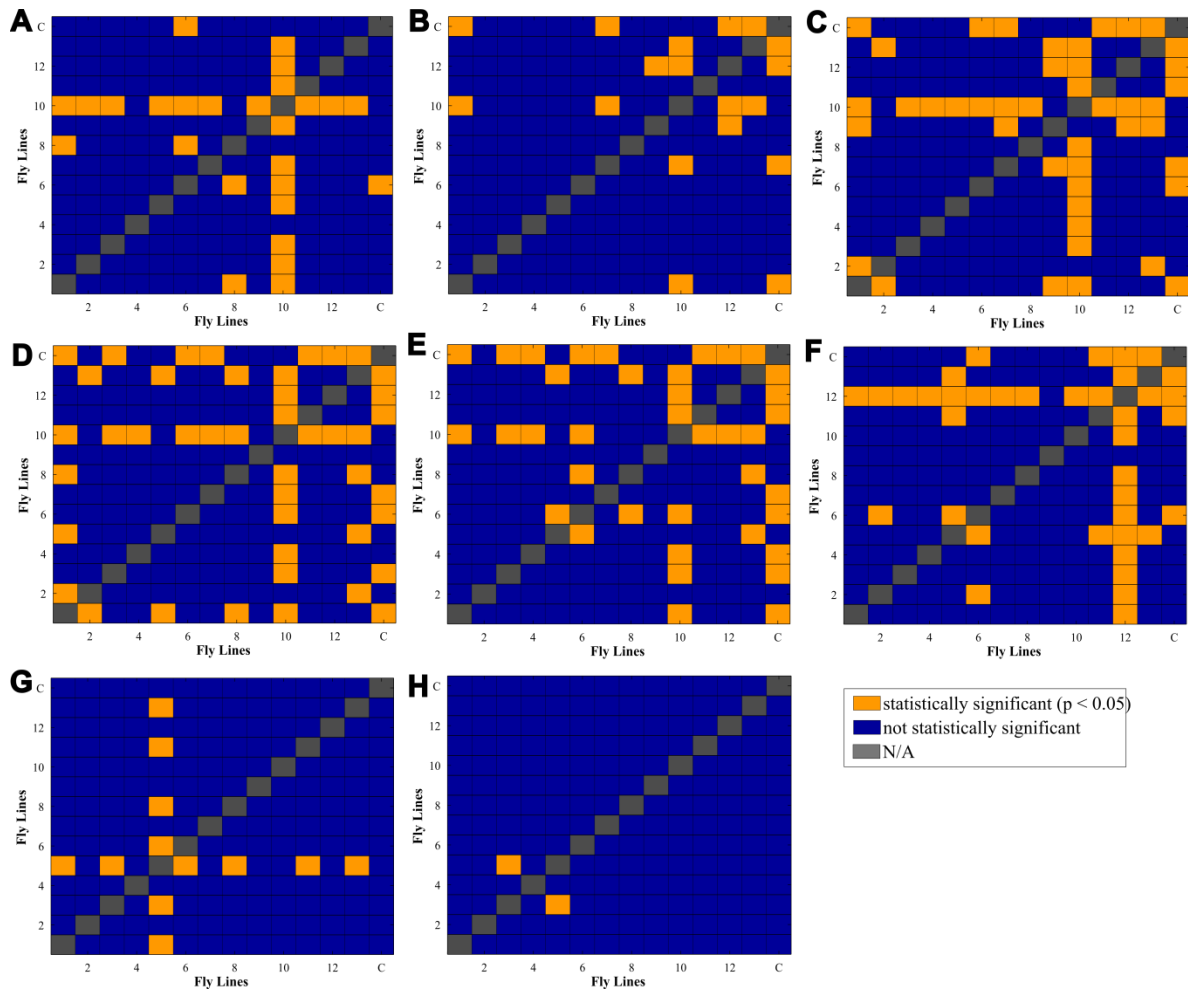

**Figure S.1:** Pair-wise comparison of position of *Kr* and *Eve* in each of the fly lines. Results of post-hoc Tukey-Kramer test, where orange denotes statistically significant ( $p < 0.05$ ) differences between the lines and blue denotes no statistically significant difference between the lines. The fly lines are in the order of: RAL150, RAL306, RAL307, RAL315, RAL317, RAL360, RAL41, RAL57, RAL705, RAL761, RAL765, RAL799, RAL801, and laboratory control; for (A) *Kr* Posterior, (B) *Eve* stripe 1, (C) *Eve* stripe 2, (D) *Eve* stripe 3, (E) *Eve* stripe 4, (F) *Eve* stripe 5, (G) *Eve* stripe 6, and (H) *Eve* stripe 7.

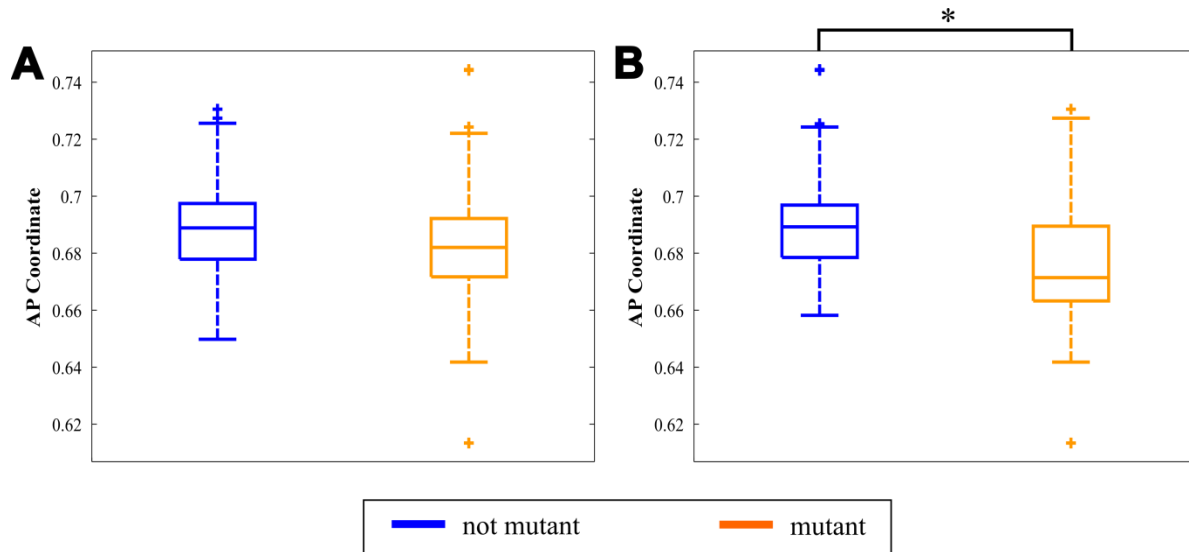

**Figure S2:** Example of Association Mapping. (A) Comparison of position of Eve stripe 6 in non-mutant lines ( $n_{\text{lines}} = 8$ ,  $n_{\text{embryos}} = 88$ ), compared to mutant lines ( $n_{\text{lines}} = 5$ ,  $n_{\text{embryos}} = 88$ ) for a non-significant SNP. (B) For a significant SNP ( $p = 0.045$ ), this SNP shows a correlation (anterior shift in Eve stripe 6) between non-mutant lines ( $n_{\text{lines}} = 8$ ,  $n_{\text{embryos}} = 123$ ) and mutant lines ( $n_{\text{lines}} = 5$ ,  $n_{\text{embryos}} = 53$ ).

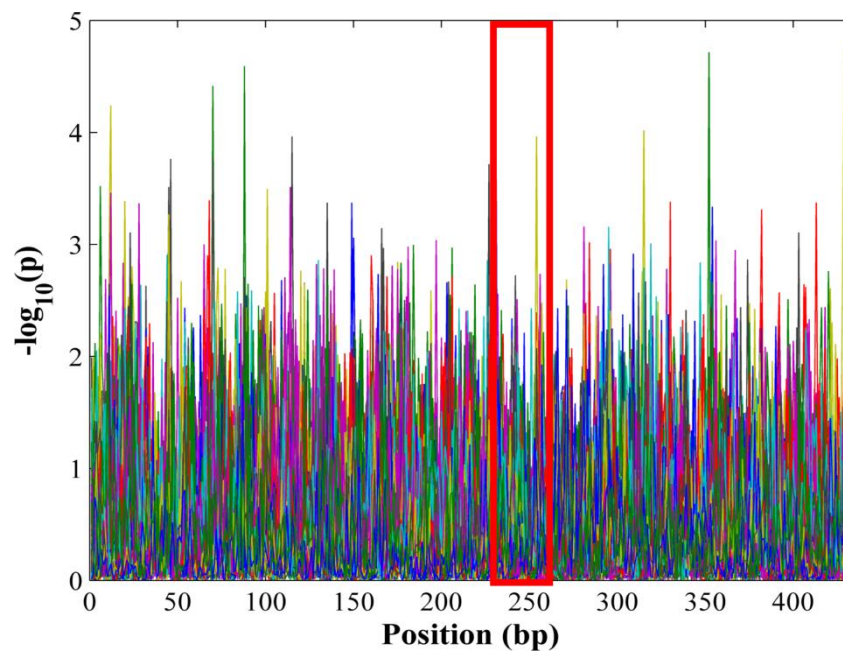

**Figure S3:** Position weight matrix analysis to find probable transcription factor binding sites. Analysis for EveA reporter construct, where each line denotes one transcription factor motif (only motifs shown to be present in one reporter construct are shown). The region directly surrounding the SNP is denoted by the red box.

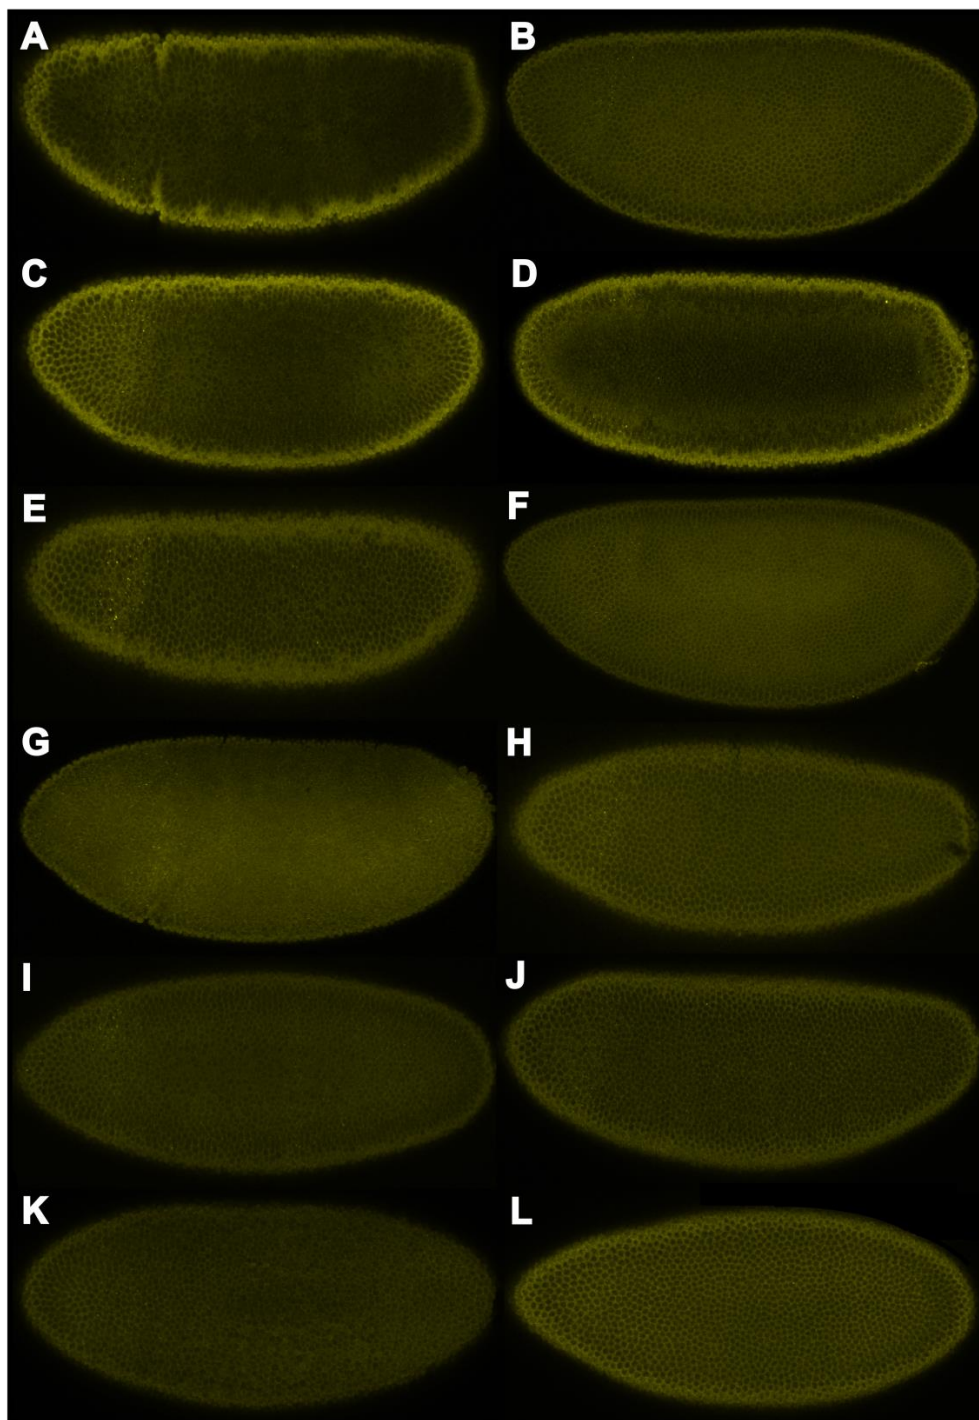

**Figure S4:** Expression of *lacZ* due to putative enhancer activity where no expression or expression due to only the minimal promoter is observed. (A) EveD, (B) EveE, (C) EveF, (D) EveG, (E) EveH, (F) EveI, (G) EveJ, (H) EveK, (I) EveL, (J) KrB, (K) KrC, and (L) KrD.

**Table S1:** Primers used to amplify enhancers from genomic DNA. Restriction enzyme sites in capital letters. Genomic region of enhancer is shown compared to start of respective gene.

| Enhancer |     | Primer Sequence                                  | Genomic Region |         |
|----------|-----|--------------------------------------------------|----------------|---------|
|          |     |                                                  | Start          | Stop    |
| KrA      | Fwd | cagacatgGAATTCgtcctttaacgggtaacacatag            | -473           | 0       |
|          | Rev | gtcagtacAGATCTgttcctttcgctgacagag                |                |         |
| KrB      | Fwd | cagacatgGAATTCcgggaattgccaacacacca               | -16,526        | -16,365 |
|          | Rev | gtcagtacAGATCTggtccaagtccgctagcaca               |                |         |
| KrC      | Fwd | cagacatgGAATTCacagttagaggccaaca                  | -7,983         | -7,703  |
|          | Rev | gtcagtacAGATCTccgcataaaagcaaatgctg               |                |         |
| KrD      | Fwd | cagacatgGAATTCgtctgagttgagcattagtggag            | -4,750         | -4,446  |
|          | Rev | gtcagtacAGATCTgctGGCGCGCCgaaacgtagagtcaagatcaagg |                |         |
| EveA     | Fwd | cagacatgGAATTCttgagcagttccaatgctt                | -19,870        | -19,432 |
|          | Rev | agctacgaGGCGCGCCgcggtgttttctacaatagg             |                |         |
| EveB     | Fwd | cagacatgGAATTCcctattgtaagaaccaccgcttgc           | -19,452        | -18,977 |
|          | Rev | gtcagtacAGATCTcctcaacctggaatgctttgt              |                |         |
| EveC     | Fwd | agctacgaGGCGCGCCtcttctactcttaattgttccg           | -12,663        | -12,311 |
|          | Rev | gtcagtacAGATCTtgcatcttctggaagact                 |                |         |
| EveD     | Fwd | cagacatgGAATTCaatagcatgtagtgacgag                | -19,906        | -19,425 |
|          | Rev | agctacgaGGCGCGCCaatgcaagcgggtgttct               |                |         |
| EveE     | Fwd | cagacatgGAATTCccgctacgccagtgactt                 | -16,641        | -16,115 |
|          | Rev | agctacgaGGCGCGCCaggcaacctgtgggatattgtgga         |                |         |
| EveF     | Fwd | cagacatgGAATTCgactacGGCGCGCCggccaacaagcaaacat    | -13,559        | -13,363 |
|          | Rev | gtcagtacAGATCTtagccagaagacctgagaa                |                |         |
| EveG     | Fwd | cagacatgGAATTCtgaacctgcaacatattgga               | -12,871        | -12,632 |
|          | Rev | gtcagtacAGATCTgagatgctggaacattaagag              |                |         |
| EveH     | Fwd | cagacatgGAATTCtaatcctttgcccacgagc                | -11,983        | -10,886 |
|          | Rev | gtcagtacAGATCTcttgactgtttggcgattt                |                |         |
| EveI     | Fwd | cagacatgGAATTCcagcagactgatcaatcattgtt            | -9,619         | -9,182  |
|          | Rev | gtcagtacAGATCTcacctccagctgagcgtt                 |                |         |
| EveJ     | Fwd | agctacgaGGCGCGCCgaaaggcgaaggcaaggtca             | -8,951         | -8,336  |
|          | Rev | gtcagtacAGATCTggcgcccgaatccaata                  |                |         |
| EveK     | Fwd | cagacatgGAATTCtaattgggtgacagcgttgccagat          | -6,527         | -6,069  |
|          | Rev | gtcagtacAGATCTtgaatgactttggtccttcggat            |                |         |
| EveL     | Fwd | cagacatgGAATTCcaggttgcatgccaatgga                | 1,925          | 2,307   |
|          | Rev | gtcagtacAGATCTctcgeatggttaccatcgt                |                |         |

**Table S2:** Sequence for Mutagenesis Primers. Mutation in capital letters.

| <b>Enhancer</b> |         | <b>Primer Sequence</b>                       |
|-----------------|---------|----------------------------------------------|
| EveA            | Forward | gatatttctcAgatttgctaaaaacacggaagtaaacaaaagtg |
|                 | Reverse | gttttagcaaatcTgaagaaatcatttgcaaaatgtcgcaaac  |
| EveB            | Forward | cgccgctgaacaaTtaacatctcaatcgaagc             |
|                 | Reverse | gagatgttaAttgttcagcggcgcaggtagaatgtg         |
| EveC            | Forward | ggcgaattctttTcaatttgtaaatagtggcaactacaatac   |
|                 | Reverse | ccaattgAaaagaattcgccaaggaaatcgcttgaag        |
| KrA             | Forward | gaaaggaacCCcttagctgtctcattcgcacc             |
|                 | Reverse | gacagctagagGGgttcctttcaatgcaaaagatatatag     |

**Table S3:** Shifts in positions of *Krüppel* in mutant fly lines. Shifts not statistical significant are not shown ( $p > 0.05$ ).

|                               |                |                        | <b>Anterior<br/>Border</b> | <b>Posterior<br/>Border</b> |
|-------------------------------|----------------|------------------------|----------------------------|-----------------------------|
| <b>Laboratory<br/>Control</b> |                | <b>position (% EL)</b> | 40.4 ± 1.3                 | 55.3 ± 2.2                  |
| <i>med</i>                    | <b>BS9033</b>  | <b>position (% EL)</b> | 41.4 ± 1.0                 |                             |
|                               |                | <b>p</b>               | 0.0080                     |                             |
|                               | <b>BS9006</b>  | <b>position (% EL)</b> | 42.1 ± 1.2                 |                             |
|                               |                | <b>p</b>               | 9.72 x 10 <sup>-6</sup>    |                             |
| <i>usp</i>                    | <b>BS4660</b>  | <b>position (% EL)</b> | 42.9 ± 1.0                 | 54.0 ± 1.4                  |
|                               |                | <b>p</b>               | 1.53 x 10 <sup>-7</sup>    | 0.0221                      |
|                               | <b>BS31414</b> | <b>position (% EL)</b> | 42.1 ± 0.6                 |                             |
|                               |                | <b>p</b>               | 4.38 x 10 <sup>-6</sup>    |                             |
| <i>gcm</i>                    | <b>BS31518</b> | <b>position (% EL)</b> | 42.3 ± 1.4                 | 56.6 ± 0.6                  |
|                               |                | <b>p</b>               | 0.0171                     | 0.0066                      |
| <i>otp</i>                    | <b>BS57582</b> | <b>position (% EL)</b> | 41.4 ± 0.9                 |                             |
|                               |                | <b>p</b>               | 0.0082                     |                             |



**Table S4:** Shifts in the positions of Eve stripes in mutant fly lines. Shifts not statistical significant are not shown ( $p > 0.05$ ).

|                           |                |                        | <b>Stripe 1</b> | <b>Stripe 2</b>         | <b>Stripe 3</b> | <b>Stripe 4</b> | <b>Stripe 6</b> | <b>Stripe 7</b> |
|---------------------------|----------------|------------------------|-----------------|-------------------------|-----------------|-----------------|-----------------|-----------------|
| <b>Laboratory Control</b> |                | <b>position (% EL)</b> | 32.4 ± 1.0      | 40.1 ± 1.1              | 47.7 ± 1.2      | 54.6 ± 1.3      | 68.9 ± 1.2      | 78.7 ± 1.6      |
| <i>med</i>                | <b>BS9033</b>  | <b>position (% EL)</b> |                 |                         |                 |                 | 67.9 ± 1.4      | 77.3 ± 1.2      |
|                           |                | <b>p</b>               |                 |                         |                 |                 | 0.0300          | 0.0025          |
|                           | <b>BS9006</b>  | <b>position (% EL)</b> | 33.9 ± 1.4      | 42.0 ± 1.6              | 49.2 ± 1.7      | 55.8 ± 1.8      |                 |                 |
|                           |                | <b>p</b>               | 0.0002          | 5.93 x 10 <sup>-5</sup> | 0.0022          | 0.0138          |                 |                 |
| <i>usp</i>                | <b>BS4660</b>  | <b>position (% EL)</b> | 33.0 ± 0.7      | 41.4 ± 0.8              |                 |                 |                 | 77.4 ± 1.5      |
|                           |                | <b>p</b>               | 0.0280          | 4.51 x 10 <sup>-5</sup> |                 |                 |                 | 0.0130          |
| <i>gcm</i>                | <b>BS28913</b> | <b>position (% EL)</b> |                 |                         |                 |                 | 70.6 ± 1.5      | 80.3 ± 1.2      |
|                           |                | <b>p</b>               |                 |                         |                 |                 | 0.0097          | 0.0033          |
| <i>otp</i>                | <b>BS57582</b> | <b>position (% EL)</b> |                 |                         |                 |                 |                 | 77.2 ± 1.9      |
|                           |                | <b>p</b>               |                 |                         |                 |                 |                 | 0.0249          |
